# Supplementary material
Source: PubMed Central journal article supplement (PMC1182410)
Supplement: pnas_0500904102_1.pdf [file pnas_0500904102_1.pdf]

**Table 2. Clinical description of breast cancer and normal breast tissues evaluated in microarray study**

| Tissue location      | Lymph node involvement             | Grade      | Mitoses per 10 hpf | Nuclear pleiomorphism | Tubule formation | Tumor size, cm | Sex | Surgical description                                      |
|----------------------|------------------------------------|------------|--------------------|-----------------------|------------------|----------------|-----|-----------------------------------------------------------|
| Breast               | 0 of 7                             | 2          | 1                  | 2                     |                  | 0.8            | F   | Wide local excision, right breast                         |
| Breast               | Not stated                         | Not stated |                    |                       |                  | 0.9            | F   | Lumpectomy                                                |
| Breast               | 4 of 8, with extranodal extension  | 3          | 3                  | 3                     | 3                | 4.7            | F   | Mastectomy - L breast                                     |
| Lymph node, axillary | 20 of 35, with extranodal invasion | 3          | 2                  | 3                     | 3                |                | F   | Mastectomy, L breast, with axillary dissection            |
| Lymph node, axillary | 20 of 35, with extranodal invasion | 3          | 2                  | 3                     | 3                |                | F   | Mastectomy, L breast, with axillary dissection            |
| Breast               | 20 of 35, with extranodal invasion | 3          | 2                  | 3                     | 3                | 1.3            | F   | Mastectomy, Lbreast, with axillary dissection             |
| Breast               | 1 of 16                            | 3          | 2                  | 3                     | 3                | 2.6            | F   | Mastectomy, L breast, with axillary dissection            |
| Lymph node, axillary | 6 of 14                            | Not stated |                    |                       |                  |                | F   | Axillary dissection, L axilla                             |
| Breast               | 1 of 22                            | 3          | 2                  | 3                     | 3                | 1.8            | F   | Mastectomy, R breast, with axillary dissection            |
| Breast               | 0 of 12                            | 2          | 1                  | 2                     | 2                | 1.2            | F   | Lumpectomy, mastectomy, L breast with axillary dissection |
| Breast               | 0 of 21                            | 2          | 2                  | 2                     | 2                | 2.7            | F   | Segmental mastectomy, with axillary dissection            |
| Lymph node, axillary | 15 of 15, extensive extranodal     | 3          | 2                  | 3                     | 3                |                | F   | Wide local excision, L breast, with axillary clearance    |
| Breast               | 15 of 15, extensive extranodal     | 3          | 2                  | 3                     | 3                | 1.8            | F   | Wide local excision, L breast, with axillary clearance    |
| Breast               | 0 of 18                            | 3          | 2                  | 2                     | 1                | 2.1            | F   | Mastectomy, R breast, with axillary dissection            |
| Breast               | 0 of 15                            | 3          |                    |                       |                  | 1.5            | F   | Mastectomy, L breast, with axillary dissection            |
| Breast               | 5 of 13                            | 3          | 3                  | 3                     | 3                | 3.5            | F   | Mastectomy, R breast, with axillary dissection            |
| Lymph node, axillary | 3 of 14                            | Not stated |                    |                       |                  |                | F   | Mastectomy, R breast, with axillary dissection            |
| Breast               | 3 of 14                            | Not stated |                    |                       |                  |                | F   | Mastectomy, R breast, with axillary dissection            |
| Lymph node, axillary | 8 of 22                            | 1          | 1                  | 1                     | 2                |                | F   | L mastectomy, lateral pectoralis major, and apical node   |
| Breast               | 1 of 12                            | 3          | 3                  | 3                     | 3                | 2.8            | F   | Mastectomy, L breast, with axillary dissection            |
| Breast               | 0 of 35                            | 3          | 3                  | 3                     | 3                | 2.8            | F   | Mastectomy, L breast, with axillary dissection            |
| Breast               | 1 of 16                            | 1          | 1                  | 2                     | 2                | 6.4            | F   | Mastectomy, R breast, with axillary dissection            |
| Breast               | 17 of 17                           | 3          | 3                  | 3                     | 3                | 4.2            | F   | Mastectomy, R breast, with axillary dissection            |
| Breast               | 4 of 15                            | 3          | 1                  | 2                     | 3                | 2.5            | F   | Wide local excision, with axillary dissection             |
| Lymph node, axillary | 2 of 5 sentinel, 0 of 10 axillary  | 2          | 1                  | 3                     | 3                |                | F   | Mastectomy, R breast, with axillary dissection            |
| Breast               | 2 of 5 sentinel, 0 of 10 axillary  | 2          | 1                  | 3                     | 3                | 4              | F   | Mastectomy, R breast, with axillary dissection            |
| Breast               | 2 of 5 sentinel, 0 of 10 axillary  | 2          | 1                  | 3                     | 3                | 0.7            | F   | Mastectomy, R breast, with axillary dissection            |

| Tissue location | Lymph node involvement          | Grade      | Mitoses per 10 hpf | Nuclear pleiomorphism | Tubule formation | Tumor size, cm | Sex  | Surgical description                                              |
|-----------------|---------------------------------|------------|--------------------|-----------------------|------------------|----------------|------|-------------------------------------------------------------------|
| Breast          | 3 of 7                          | 3          | 2                  | 3                     | 3                | 2.5            | F    | Mastectomy, R breast, with axillary dissection                    |
| Breast          | 0 of 17                         | 2          | 1                  | 2                     | 3                | 4              | F    | Mastectomy, R breast, with axillary clearance                     |
| Breast          | 0 of 13                         | 2          | 1                  | 2                     | 3                | 2.5            | F    | Segmental mastectomy, with axillary dissection                    |
| Breast          | 6 of 27                         | 3          | 3                  | 3                     | 3                | 2              | F    | Wide local excision, L breast, with axillary dissection           |
| Breast          | 0 of 2                          | 1          | 1                  | 1                     | 3                | 1.5            | F    | Segmental mastectomy, R breast, with sentinel node biopsy         |
| Breast          | 1 of 1 (sentinel)               | 3          | 3                  | 2                     | 3                | 2.4            | F    | Mastectomy, R breast, with sentinel node biopsy                   |
| Breast          | 1 of 1 (sentinel)               | 3          | 3                  | 2                     | 3                | 2.4            | F    | Mastectomy, R breast, with sentinel node biopsy                   |
| Breast          | 0 of 18                         | 2          | 1                  | 2                     | 3                | 3              | F    | Mastectomy, R breast, with axillary dissection                    |
| Breast          | 2 of 9                          | 3          | 3                  | 2                     | 3                | 2.1            | F    | Mastectomy                                                        |
| Breast          | 0 of 23                         | 2          | 1                  | 2                     | 3                | 2.1            | F    | Wide local excision, with axillary dissection                     |
| Breast          | 1 of 14                         | 3          | 2                  | 2                     | 3                | 6              | F    | Wide local excision, left breast, axillary dissection             |
| Breast          | 0 of 1 (sentinel)               | 1          | 1                  | 1                     | 3                | 1.3            | F    | Mastectomy                                                        |
| Breast          | Left 1 of 1; Right 0 of 1       | 1          | 2                  | 2                     | 2                | 4              | F    | Double mastectomy. Tumors found in both breasts.                  |
| Breast          | Not stated                      | Not stated |                    |                       |                  | 4              | F    | Mastectomy                                                        |
| Breast          | 2 of 12                         | 1          | 1                  |                       |                  | 2.2            | F    | Segmental mastectomy, L breast with axillary dissection           |
| Breast          | 13 of 19; extensive replacement | 2          |                    |                       |                  | 4.7            | F    | Mastectomy, L breast, with axillary dissection                    |
| Breast          | 4 of 27 with extranodal spread  | 3          |                    |                       |                  | 3              | Male | Mastectomy, L breast, with axillary clearance                     |
| Breast          | 0 of 17                         | 2          | 2                  | 3                     | 1                | 1.2            | F    | Mastectomy, R breast, with axillary clearance                     |
| Breast          | Not stated                      | Not stated |                    |                       |                  | 0.6            | F    | Wide re-excision, L breast                                        |
| Breast          | 0 of 24                         | 2          | 1                  | 3                     | 3                | 1.2            | F    | Mastectomy, L breast, with axillary dissection                    |
| Breast          | 3 of 3                          | 2          | 1                  | 2                     | 3                | 7              | F    | Mastectomy, R breast, with axillary dissection                    |
| Breast          | Not stated                      | 2          |                    |                       |                  | 6.5            | F    | Mastectomy, R breast.                                             |
| Breast          | 0 of 11                         | 2          | 2                  | 3                     | 1                | 2.5            | F    | Mastectomy, R breast, with axillary dissection                    |
| Breast          | 1 of 21                         | 1          | 1                  | 3                     | 1                | 1.4            | F    | Mastectomy, L breast, with axillary dissection                    |
| Breast          | 0 of 28                         | 3          |                    |                       |                  | 2.5            | F    | Mastectomy, L breast, with axillary dissection, and muscle tissue |
| Breast          | 0 of 17                         | 2          | 1                  | 3                     | 3                | 2.1            | F    | Mastectomy, R breast, with axillary dissection                    |
| Breast          | 0 of 1                          | 2          | 1                  | 2                     | 3                | 2              | Male | Mastectomy, L breast, with axillary dissection                    |
| Breast          |                                 | N/A        |                    |                       |                  |                | F    | Lumpectomy, mastectomy, L breast with axillary dissection         |
| Breast          |                                 | N/A        |                    |                       |                  |                | F    |                                                                   |
| Breast          |                                 | N/A        |                    |                       |                  |                | F    | Mastectomy, R breast, with axillary dissection                    |

| Tissue location | Lymph node involvement | Grade | Mitoses per 10 hpf | Nuclear pleiomorphism | Tubule formation | Tumor size, cm | Sex  | Surgical description                                   |
|-----------------|------------------------|-------|--------------------|-----------------------|------------------|----------------|------|--------------------------------------------------------|
| Breast          |                        | N/A   |                    |                       |                  |                | F    | Mastectomy, R breast, with axillary dissection         |
| Breast          |                        | N/A   |                    |                       |                  |                | F    | Cadaveric; death by trauma (no evidence of malignancy) |
| Breast          |                        | N/A   |                    |                       |                  |                | F    | Cadaveric; death by trauma (no evidence of malignancy) |
| Breast          |                        | N/A   |                    |                       |                  |                | Male | Cadaveric; death by trauma (no evidence of malignancy) |
| Breast          |                        | N/A   |                    |                       |                  |                | F    | Cadaveric; death by trauma (no evidence of malignancy) |
| Breast          |                        | N/A   |                    |                       |                  |                | F    | Cadaveric; death by trauma (no evidence of malignancy) |
