# Supplementary material
Source: PubMed Central journal article supplement (PMC1182410)
Supplement: pnas_0500904102_4.pdf [file pnas_0500904102_4.pdf]

**Table 3. Summary of nuclear staining data in 40 invasive breast cancer specimens with the 8A1 and 8D11 anti-trichorhinophalangeal syndrome type 1 (anti-TRPS-1) clones**

| mAb        | No. of cases | Invasive tumor present? | Nuclear staining present? | Nuclei stained, % |
|------------|--------------|-------------------------|---------------------------|-------------------|
| Clone 8A1  | 2            | Yes                     | Yes                       | 50                |
|            | 8            | Yes                     | Yes                       | 75                |
|            | 11           | Yes                     | Yes                       | 90                |
|            | 13           | Yes                     | Yes                       | 100               |
|            |              |                         |                           |                   |
| Clone 8D11 | 1            | Yes                     | Yes                       | 60                |
|            | 13           | Yes                     | Yes                       | 75                |
|            | 10           | Yes                     | Yes                       | 90                |
|            | 13           | Yes                     | Yes                       | 100               |

Staining was done in duplicate on all 40 tumors with two different mAbs (clone 8A1 and 8D11) yielding similar results. Over 85% of the tumors had staining in a minimum of 50% of the tumor cells, and 60% had staining in at least 90% of the cells.
