# Supplementary material
Source: PubMed Central journal article supplement (PMC1182410)
Supplement: pnas_0500904102_5.pdf [file pnas_0500904102_5.pdf]

**Table 4. Summary of nuclear staining data for 10 specimens of ductal carcinoma *in situ* (DCIS) stained with the 8A1 and 8D11 anti-trichorhinophalangeal syndrome type 1 (anti-TRPS-1) clones**

| mAb        | No. of cases | <i>In situ</i> tumor present? | Invasive tumor present? | <i>In situ</i> nuclear staining present? | Nuclei stained, % |
|------------|--------------|-------------------------------|-------------------------|------------------------------------------|-------------------|
| Clone 8A1  | 1            | Yes                           | No                      | Yes                                      | <10               |
|            | 1            | Yes                           | No                      | Yes                                      | 10                |
|            | 3            | Yes                           | No                      | Yes                                      | 75                |
|            | 5            | Yes                           | No                      | Yes                                      | 90                |
|            |              |                               |                         |                                          |                   |
| Clone 8D11 | 1            | Yes                           | No                      | Yes                                      | 10                |
|            | 1            | Yes                           | No                      | Yes                                      | 30                |
|            | 2            | Yes                           | No                      | Yes                                      | 75                |
|            | 5            | Yes                           | No                      | Yes                                      | 90                |
|            | 1            | Yes                           | No                      | Yes                                      | 100               |

Ten early DCIS samples were stained with no evidence of an invasive component. Of these 10, nine had nuclear staining in at least 10% of the cells. Eight of 10 DCIS had >75% of the cells positive. The samples were stained in duplicate with two separate mAbs (8A1 and 8D11) and yielded similar results.
