# Supplementary material
Source: PubMed Central journal article supplement (PMC1182410)
Supplement: pnas_0500904102_8.pdf [file pnas_0500904102_8.pdf]

**Table 5. Pools of trichorhinophalangeal syndrome type 1 (TRPS-1) nonamer peptides used to stimulate human T cell lines and assay for cytotoxic T lymphocyte (CTL) activity in spleen cell cultures after immunization of HLA-A2/Kb transgenic mice**

| Peptide group | Peptide number | Sequence  | Peptide group | Peptide number | Sequence  |
|---------------|----------------|-----------|---------------|----------------|-----------|
| 1             | CLP2421        | MVRKKNPPL | 6             | CLP2471        | FITQVEEEI |
|               | CLP2422        | KKNPPLRNV |               | CLP2472        | FTAADTQSL |
|               | CLP2423        | VASEGEGQI |               | CLP2473        | SLLEHFNTV |
|               | CLP2424        | QILEPIGTE |               | CLP2474        | STIKEEKI  |
|               | CLP2425        | RNMLAFSFP |               | CLP2475        | KIDFRVYNL |
|               | CLP2426        | NMLAFSFP  |               | CLP2476        | NLLTPDSKM |
|               | CLP2427        | MLAFSFPAA |               | CLP2479        | VTWRGADIL |
|               | CLP2428        | FSFPAAGGV |               | CLP2480        | ILRGSPSYT |
|               | CLP2429        | AAGGVCEPL |               |                |           |
|               | CLP2430        | SGQANCQGL |               |                |           |
| 2             | CLP2431        | ANCQGLSPV | 7             | CLP2481        | YTQASLGLL |
|               | CLP2432        | GLSPVSVAS |               | CLP2482        | ASLGLLTPV |
|               | CLP2433        | SVASKNPQV |               | CLP2483        | GLLTPVSGT |
|               | CLP2434        | RLNKSITDL |               | CLP2484        | GTQEQTCTL |
|               | CLP2435        | NDNPDAPL  |               | CLP2485        | KTLRDSPNV |
|               | CLP2436        | DPAPLSPEL |               | CLP2486        | HLARPIYGL |
|               | CLP2437        | ELQDFKCN  |               | CLP2487        | PIYGLAVET |
|               | CLP2438        | GLHNRTRQD |               | CLP2488        | LAVETKGF  |
|               | CLP2439        | ELDSKILAL |               | CLP2489        | FLQGAPAGG |
|               | CLP2440        | KILALHNMV |               | CLP2500        | AGGEKSGAL |
| 3             | CLP2441        | ALHNMVQFS | 8             | CLP2491        | GALPQQYPA |
|               | CLP2442        | VNRSVFSGV |               | CLP2492        | ALPQQYPAS |
|               | CLP2443        | FSGVLQDIN |               | CLP2493        | FCANCLTTK |
|               | CLP2444        | DINSSRPVL |               | CLP2494        | ANGGYVCNA |
|               | CLP2445        | VLLNGTYDV |               | CLP2495        | NACGLYQKL |
|               | CLP2446        | FCNFYMGN  |               | CLP2496        | GLYQLHST  |
|               | CLP2447        | YMGNSSTEL |               | CLP2497        | KLHSTPRPL |
|               | CLP2448        | FLQTHPNKI |               | CLP2498        | STPRLNII  |
|               | CLP2449        | KASLPSSEV |               | CLP2499        | RLNPEALQA |
|               | CLP2450        | DLGKWQDKI |               | CLP2500        | VLVSQTLDI |
| 4             | CLP2451        | VKAGDDTPV | 9             | CLP2501        | DIHKRMQPL |
|               | CLP2452        | FSCSSSSL  |               | CLP2502        | RMQPLHIQI |
|               | CLP2453        | KLLEHYGKQ |               | CLP2503        | YPLFGLPFV |
|               | CLP2454        | GLNPELNDK |               | CLP2504        | GLPFVHNDF |
|               | CLP2455        | GSVINQNDL |               | CLP2505        | FVHNDFQSE |
|               | CLP2456        | SVINQNDLA |               | CLP2506        | SVPGNPHYL |
|               | CLP2457        | FCDFRYSKS |               | CLP2507        | GNPHYLSHV |
|               | CLP2458        | SHGPDVIVV |               | CLP2508        | HYLSHVPGI |
|               | CLP2459        | PLLRHYQQL |               | CLP2509        | YVPYPTFNL |
|               | CLP2460        | GLCSPEKHL |               | CLP2510        | FNLPPHFS  |
| 5             | CLP2461        | HLGEITYPF | 10            | CLP2511        | NLPPHFS   |
|               | CLP2462        | LGEITYPFA |               | CLP2512        | SAVGSNDI  |
|               | CLP2463        | HCALLLHL  |               | CLP2513        | KNEGFLNVV |
|               | CLP2464        | ALLLHLSP  |               | CLP2514        | TKCVHCGIV |
|               | CLP2465        | LLLLHLSPG |               | CLP2515        | CVHCGIVFL |
|               | CLP2466        | LLLHLSPGA |               | CLP2516        | CGIVFLDEV |
|               | CLP2467        | LLHLSPGAA |               | CLP2517        | FLDEVMYAL |
|               | CLP2468        | FTTPDVDVL |               | CLP2518        | VMYALHMSC |
|               | CLP2469        | TTDPDVL   |               | CLP2519        | FQCSICQHL |
|               | CLP2470        | VLLFHYESV |               | CLP2520        | GLHRNNAQV |
