# Supplementary material
Source: PubMed Central journal article supplement (PMC1182410)

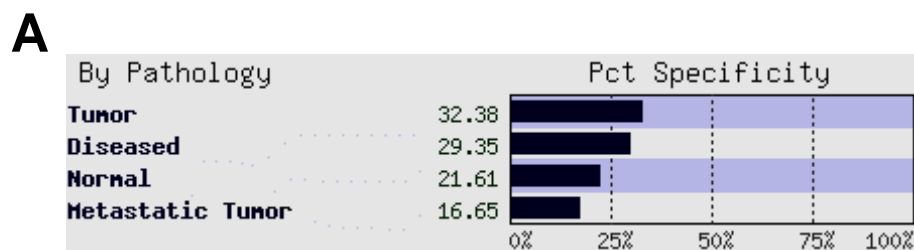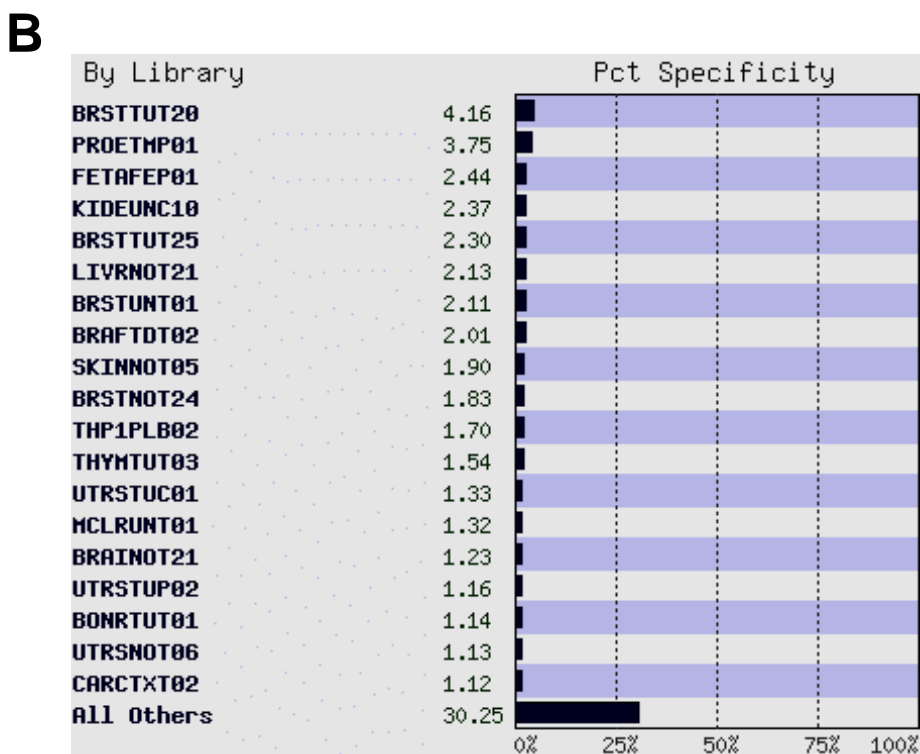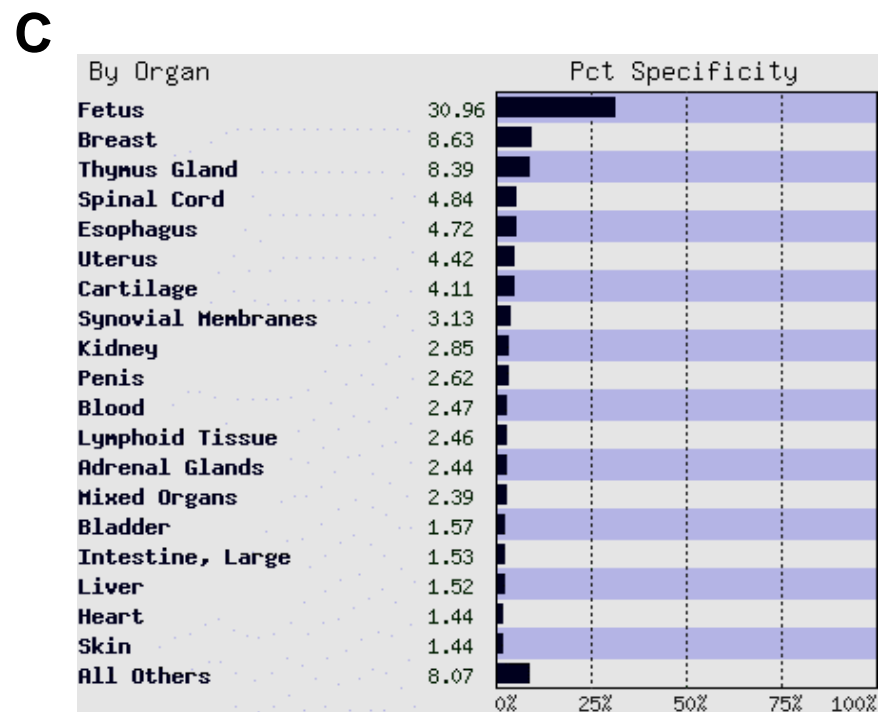

Supplement: pnas_0500904102_2.pdf [file pnas_0500904102_2.pdf]

**A**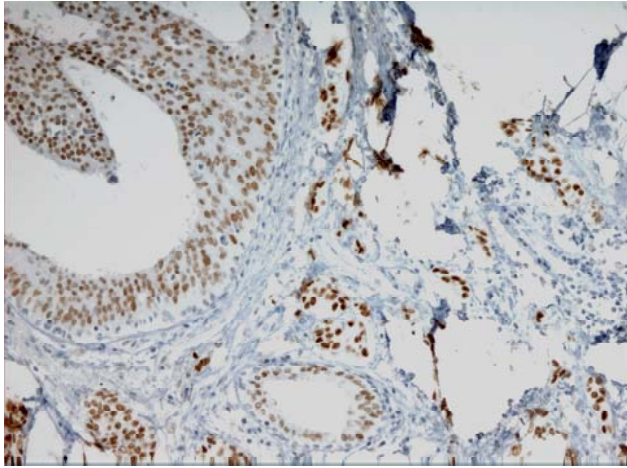**B**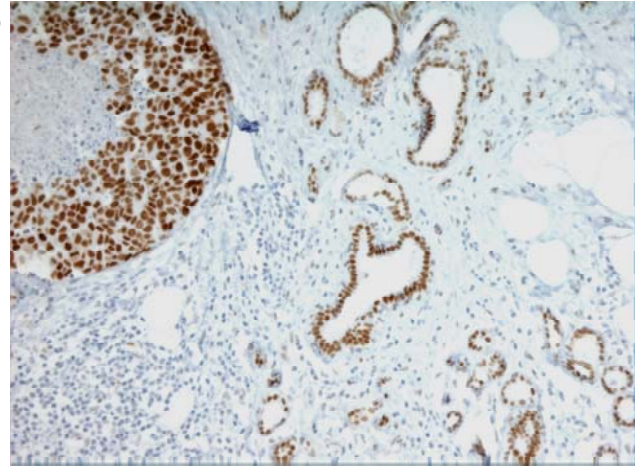**C**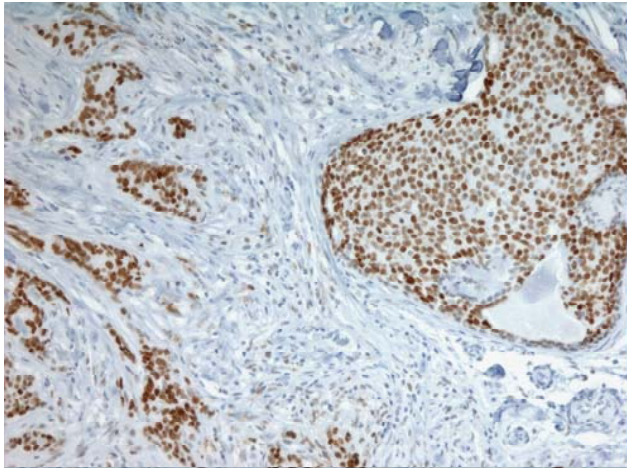**D**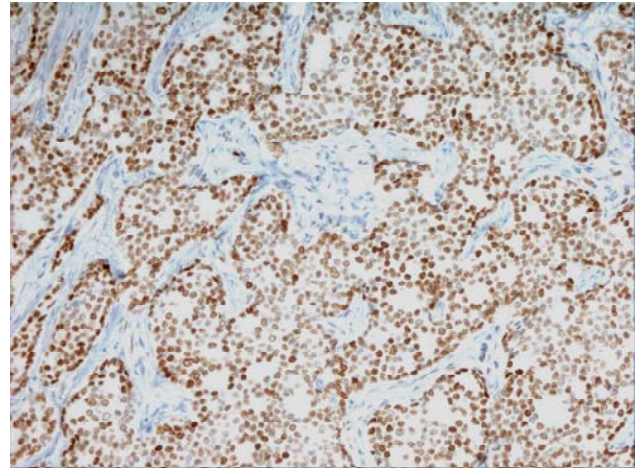

Supplement: pnas_0500904102_3.pdf [file pnas_0500904102_3.pdf]

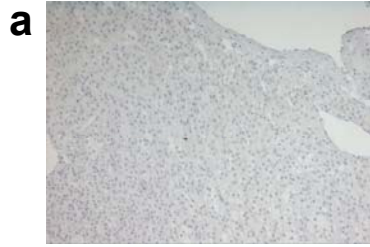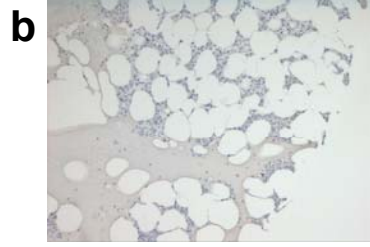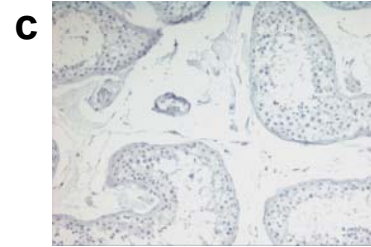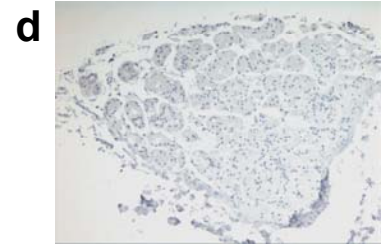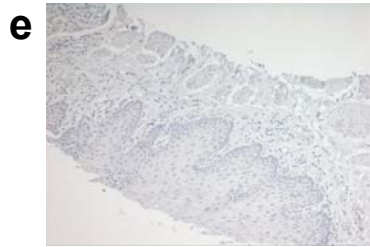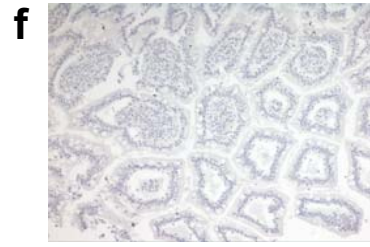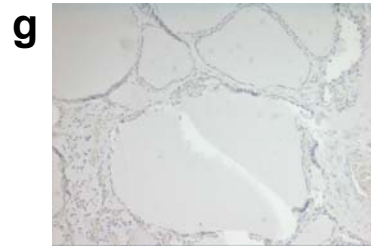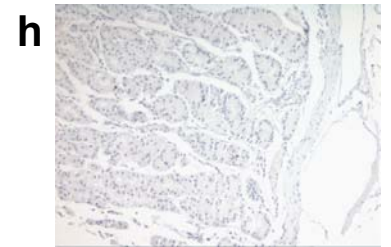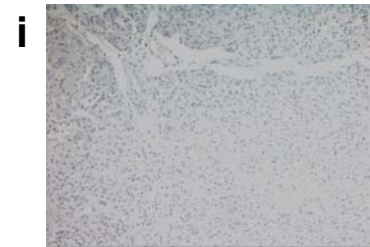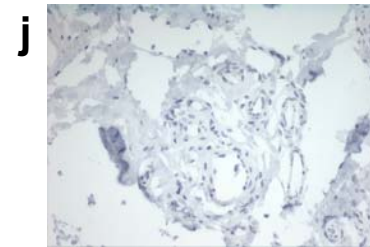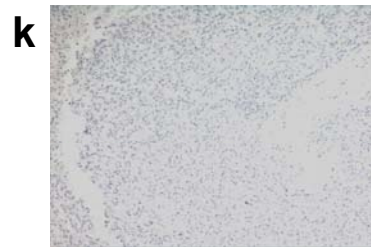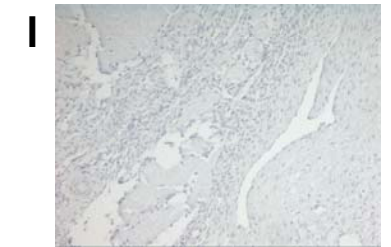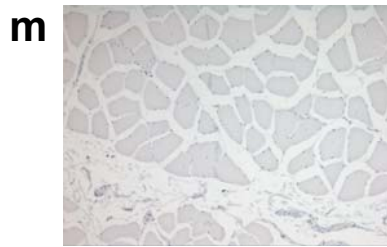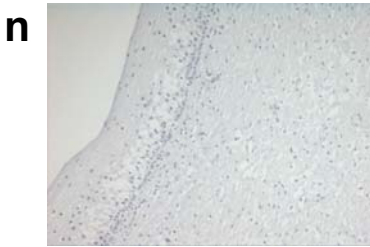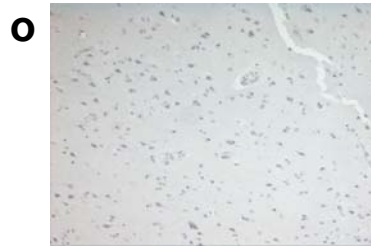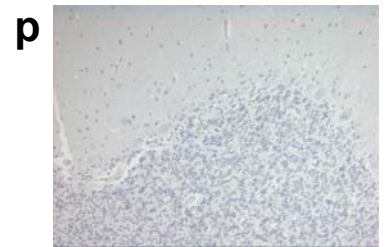

Supplement: pnas_0500904102_6.pdf [file pnas_0500904102_6.pdf]

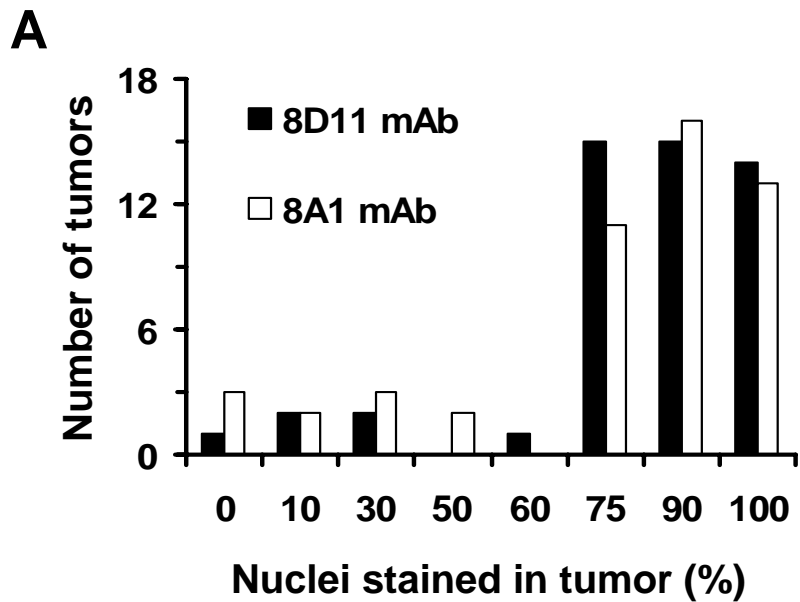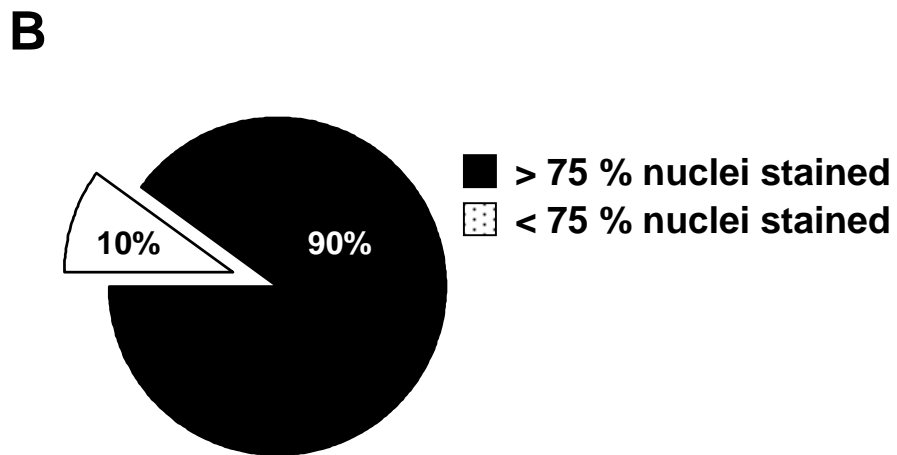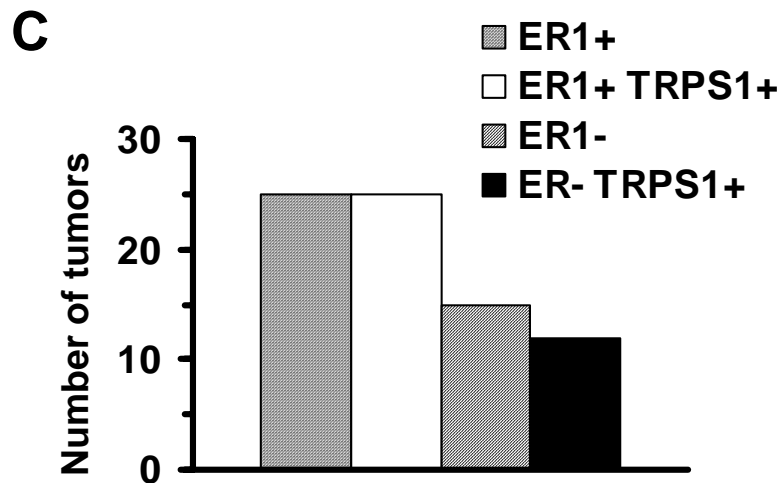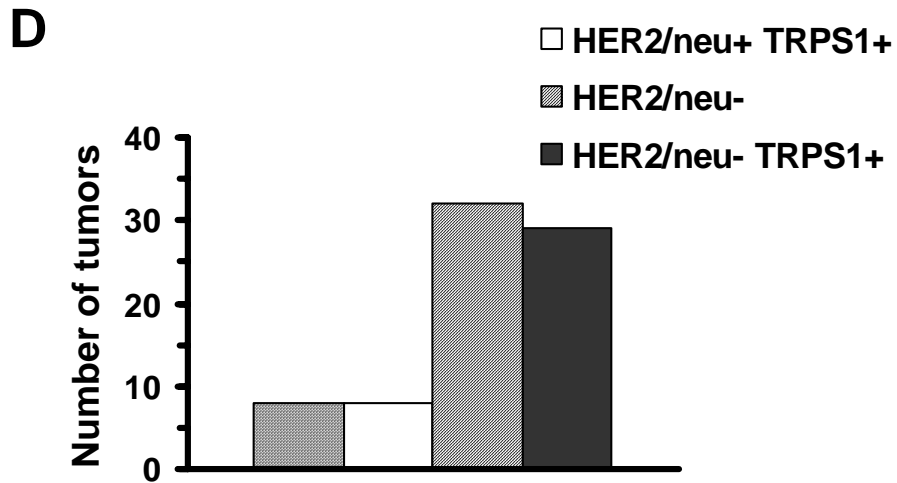

Supplement: pnas_0500904102_7.pdf [file pnas_0500904102_7.pdf]
